# Supplementary material for: Polyaniline–single walled carbon nanotube composite – a photocatalyst to degrade rose bengal and methyl orange dyes under visible-light illumination
Source: Royal Society of Chemistry journal article supplement (doi:10.1039/c7ra03855k), 2017-01-01
Supplement: c7ra03855k1.pdf [file c7ra03855k1.pdf]

# **Polyaniline-single walled carbon nanotube composite--a photocatalyst to degrade Rose Bengal and Methyl Orange dyes under visible-light illumination**

Mukulika Jana Chatterjee<sup>1</sup>, Amrita Ghosh<sup>2</sup>, AnupMondal<sup>2</sup>, Dipali Banerjee<sup>1\*</sup>

<sup>1</sup>*Department of Physics, Indian Institute of Engineering Science and Technology (IEST), Shibpur,  
Howrah-711103, West Bengal, India*

<sup>2</sup>*Department of Chemistry, Indian Institute of Engineering Science and Technology (IEST), Shibpur,  
Howrah-711103, West Bengal, India*

\*Corresponding author: [dipalibanerjeebesu@gmail.com](mailto:dipalibanerjeebesu@gmail.com)

## **SUPPORTING INFORMATION**

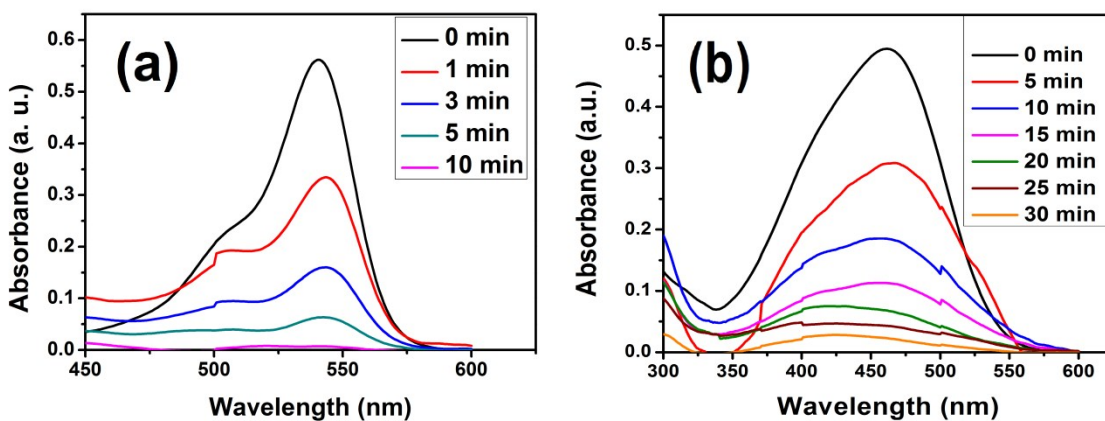

**Figure SI-1. UV-vis absorption spectral changes of (a) RB and (b) MO dye in presence of PC2 due to visible light irradiated photo catalysis**
